# Supplementary material for: Development of Surface Molecularly Imprinted Polymers as Dispersive Solid Phase Extraction Coupled with HPLC Method for the Removal and Detection of Griseofulvin in Surface Water
Source: MDPI journal article supplement (doi:10.3390/ijerph17010134), 2019-12-24
Supplement: s1 [file s1]

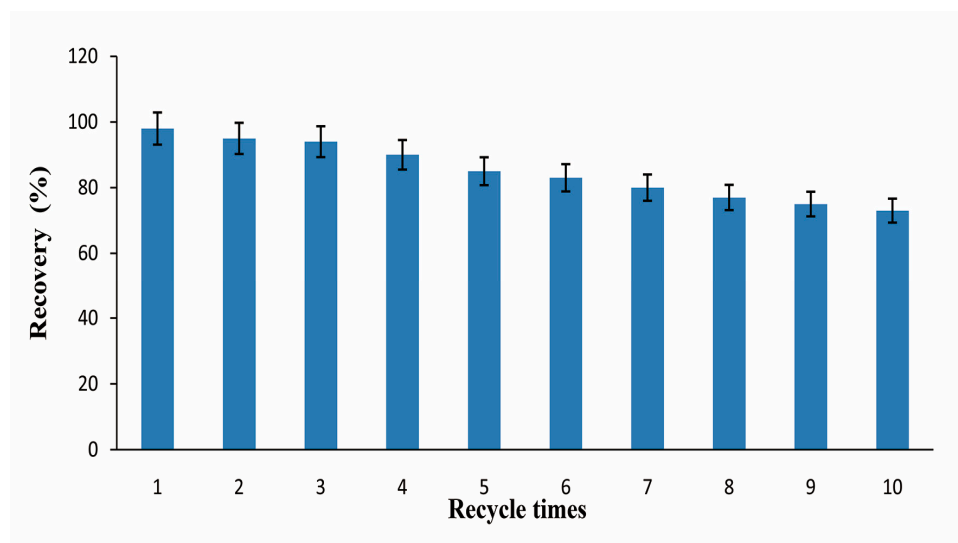

**Figure S1.** Reusability of SMIPs.
